# Supplementary material for: In-Depth Characterization and Validation of Human Urine Metabolomes Reveal Novel Metabolic Signatures of Lower Urinary Tract Symptoms
Source: PubMed Central journal article supplement (PMC4977550; doi:10.1038/srep30869), 2016-08-09
Supplement: srep30869-s1.pdf [file srep30869-s1.pdf]

# **In-Depth Characterization and Validation of Human Urine Metabolomes Reveal Novel Metabolic Signatures of Lower Urinary Tract Symptoms**

Ling Hao<sup>1</sup>, Tyler Greer<sup>2</sup>, David Page<sup>3</sup>, Yatao Shi<sup>1</sup>, Chad M. Vezina<sup>4,7</sup>, Jill A. Macoska<sup>5,7</sup>, Paul C. Marker<sup>1,7</sup>, Dale E. Bjorling<sup>4,7</sup>, Wade Bushman<sup>6,7,#</sup>, William A. Ricke<sup>6,7,#</sup>, and Lingjun Li<sup>1,2\*</sup>

<sup>1</sup>School of Pharmacy, University of Wisconsin-Madison, Madison, WI, 53705, USA, <sup>2</sup>Department of Chemistry, University of Wisconsin-Madison, Madison, WI, 53706, USA, <sup>3</sup>Department of Biostatistics & Medical Informatics, University of Wisconsin-Madison, Madison, WI, 53706, USA, <sup>4</sup>School of Veterinary Medicine, University of Wisconsin-Madison, Madison, WI, 53706, USA, <sup>5</sup>Center for Personalized Cancer Therapy, University of Massachusetts, Boston, MA, 02125, USA, <sup>6</sup>Department of Urology, University of Wisconsin-Madison, Madison, WI, 53792, USA, and <sup>7</sup>George M. O'Brien Urology research Center, University of Wisconsin-Madison, Madison, WI, USA.

# These authors contributed equally.

\*Corresponding author

Tel.: +1 (608) 265-8491

Fax: +1 (608) 262-5345

E-mail: [lingjun.li@wisc.edu](mailto:lingjun.li@wisc.edu)

## SUPPLEMENTARY INFORMATION

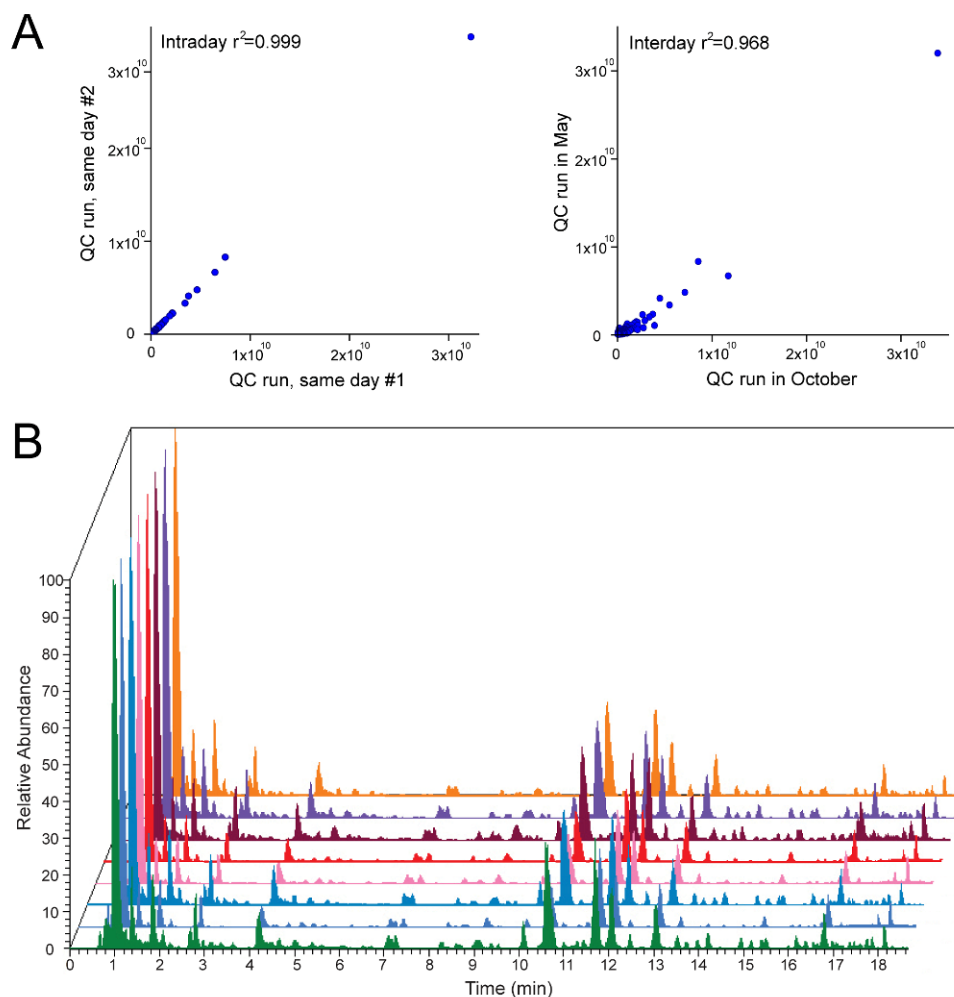

**Figure S1. Validation of technical reproducibility of the established metabolomics platform using QC samples.** **A:** Correlation of peak areas between technical replicates for both inter-day and intra-day LC-MS injections. Each data point corresponds to a detected feature across two QC runs within a day or between days. The data point at the upper-right corner of each graph represents creatinine peak area, which is the highest abundance compound in urine. **B:** Base peak chromatograms of eight QC samples injected throughout months.

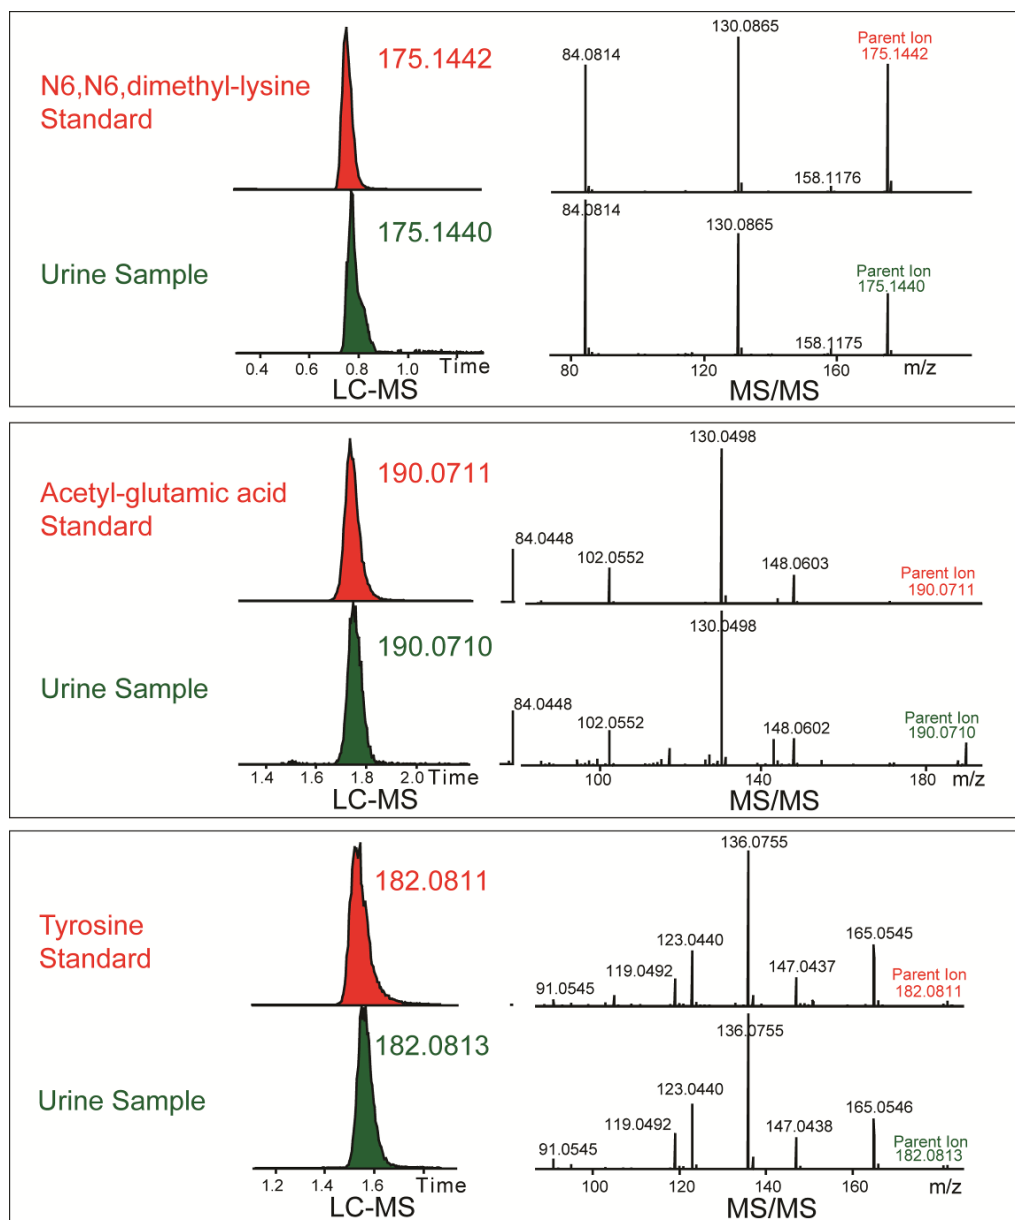

**Figure S2. Examples of ID confirmation for metabolite identification.** Detected metabolite in urine (green) were confirmed with available standard compounds (red) via the comparison of LC-MS retention time, accurate mass, and MS/MS fragmentation.

# A LYSINE DEGRADATION

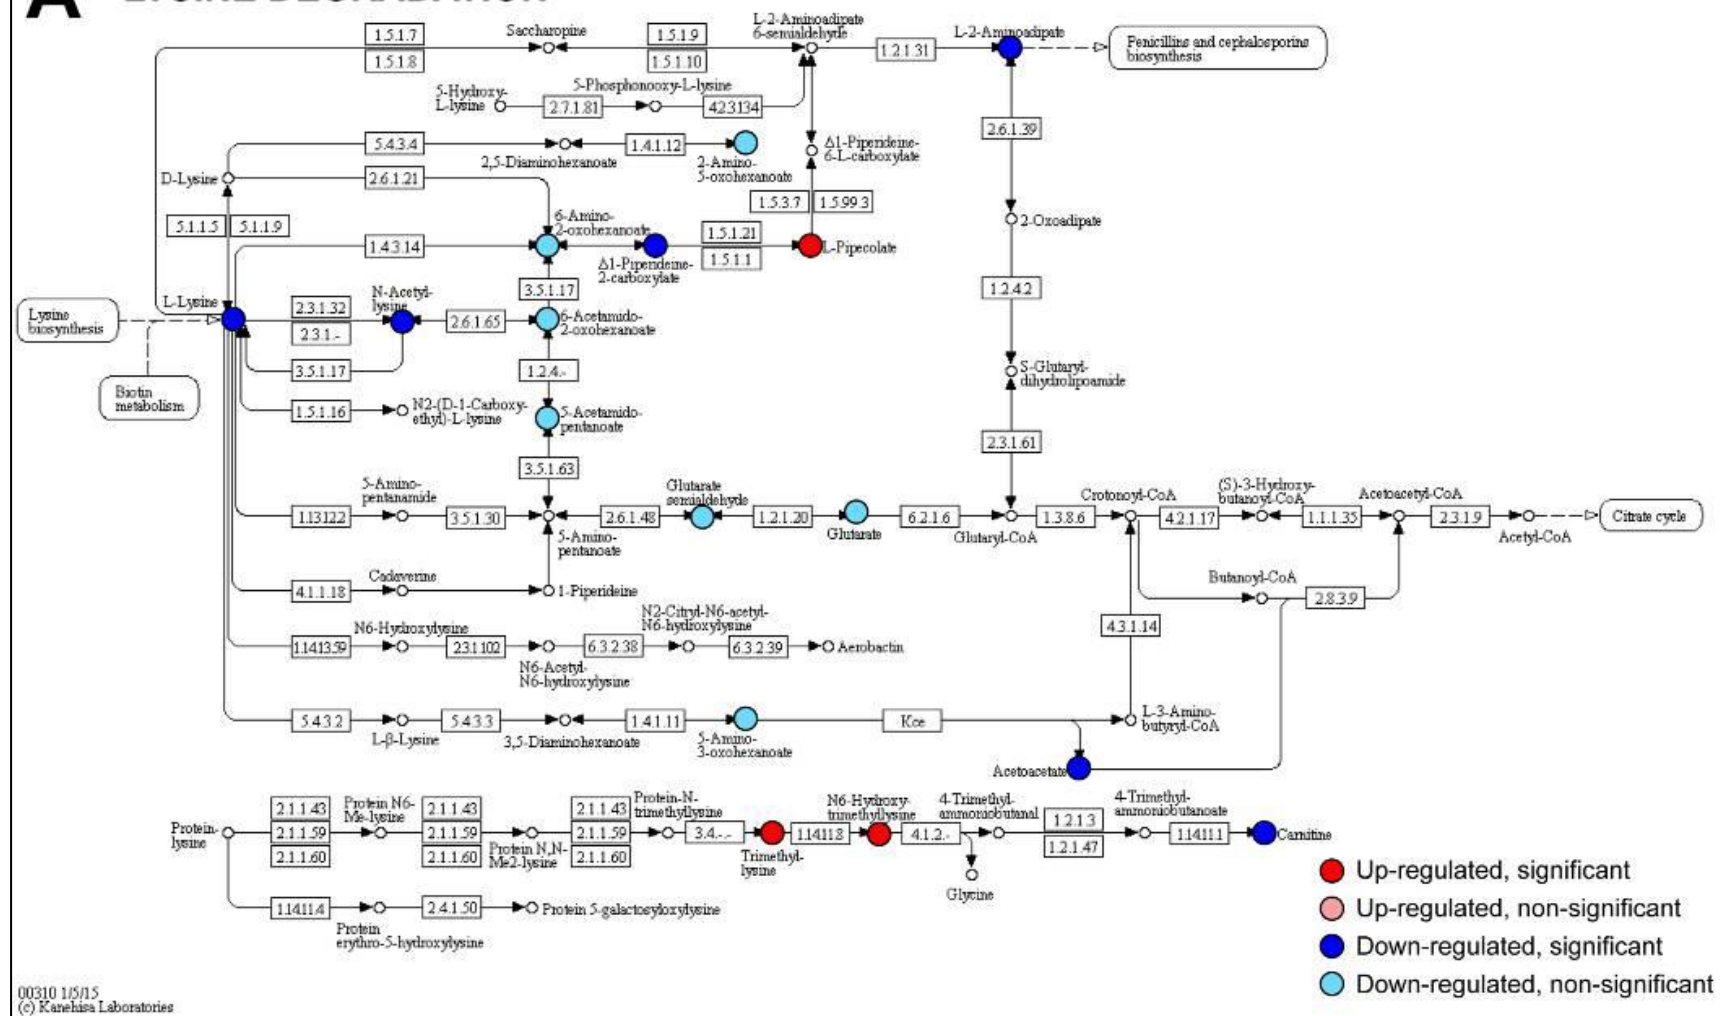

# B ARGININE AND PROLINE METABOLISM

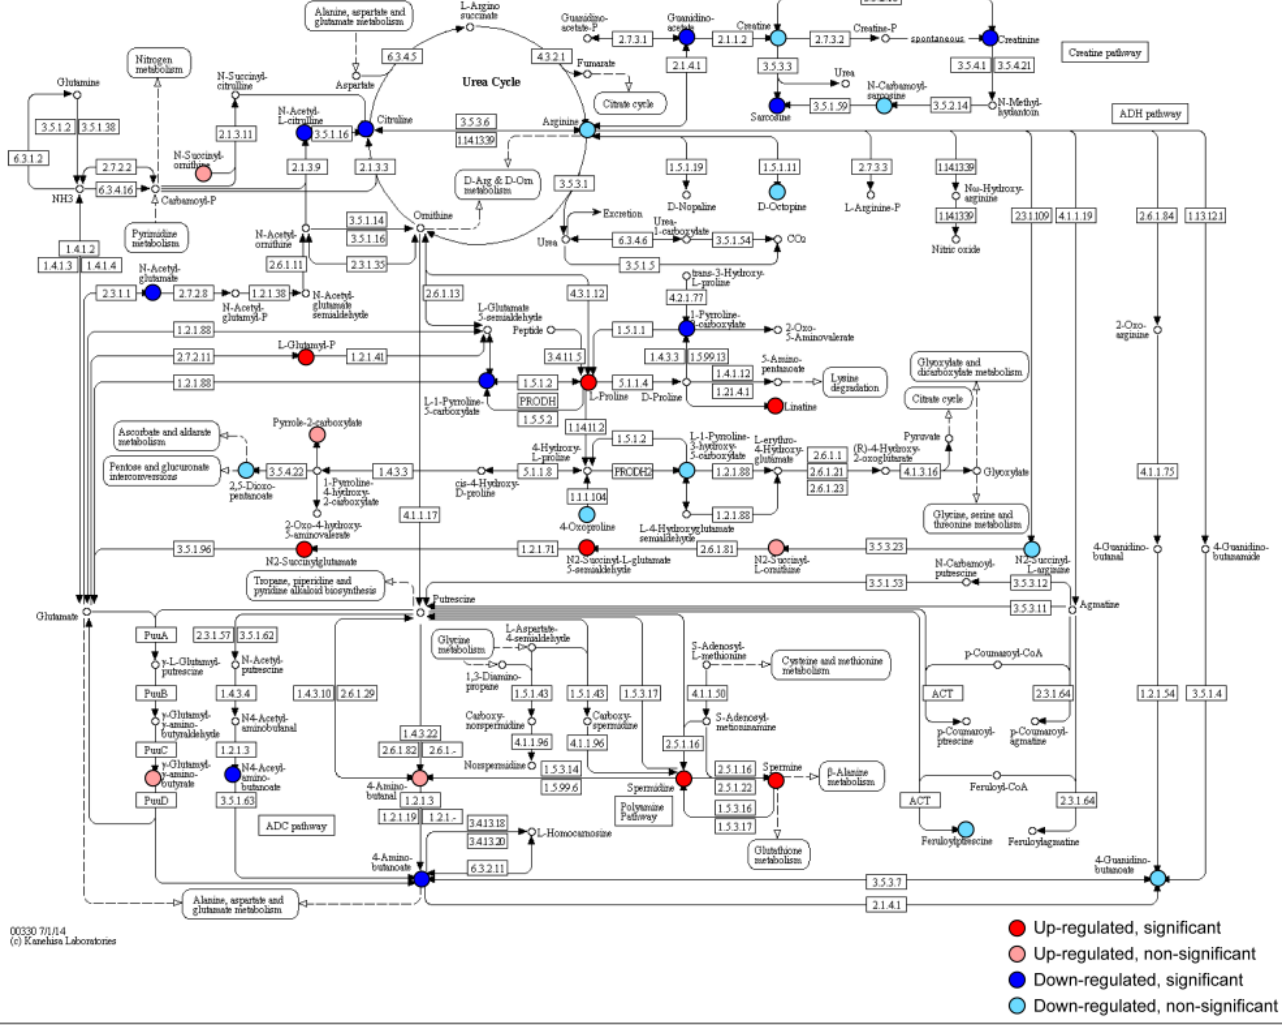

00330 7/1/14  
© Kazuhisa Laboratories

# C TYROSINE METABOLISM

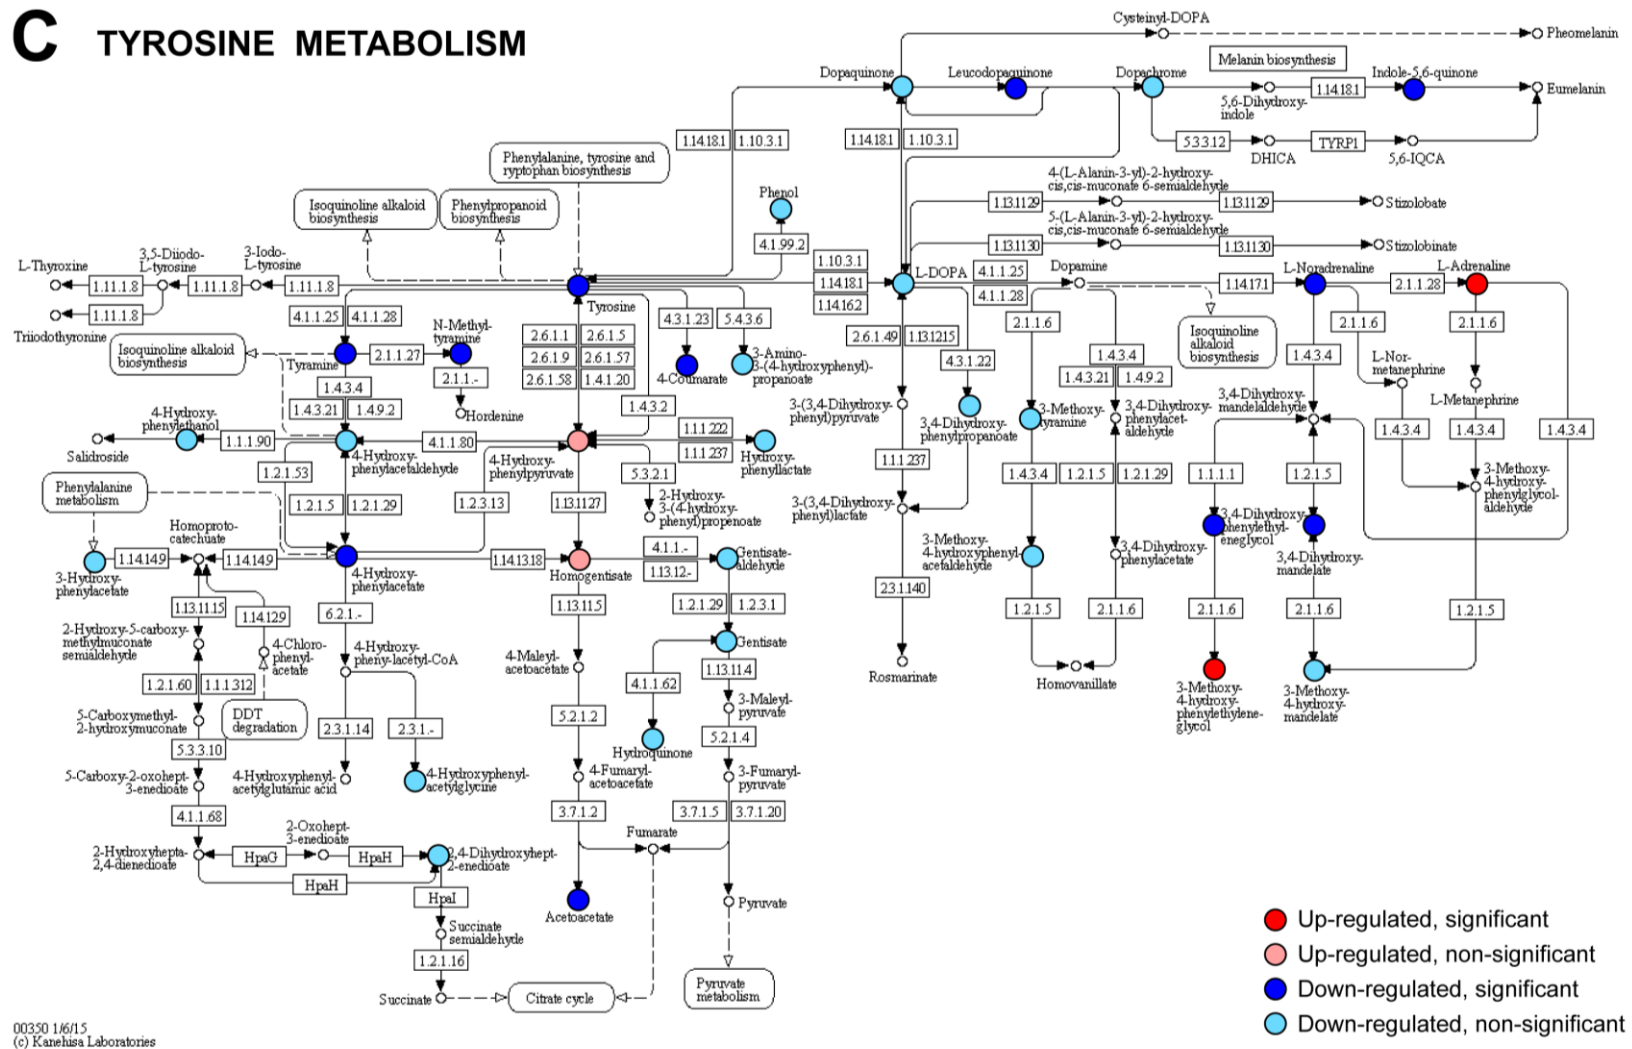

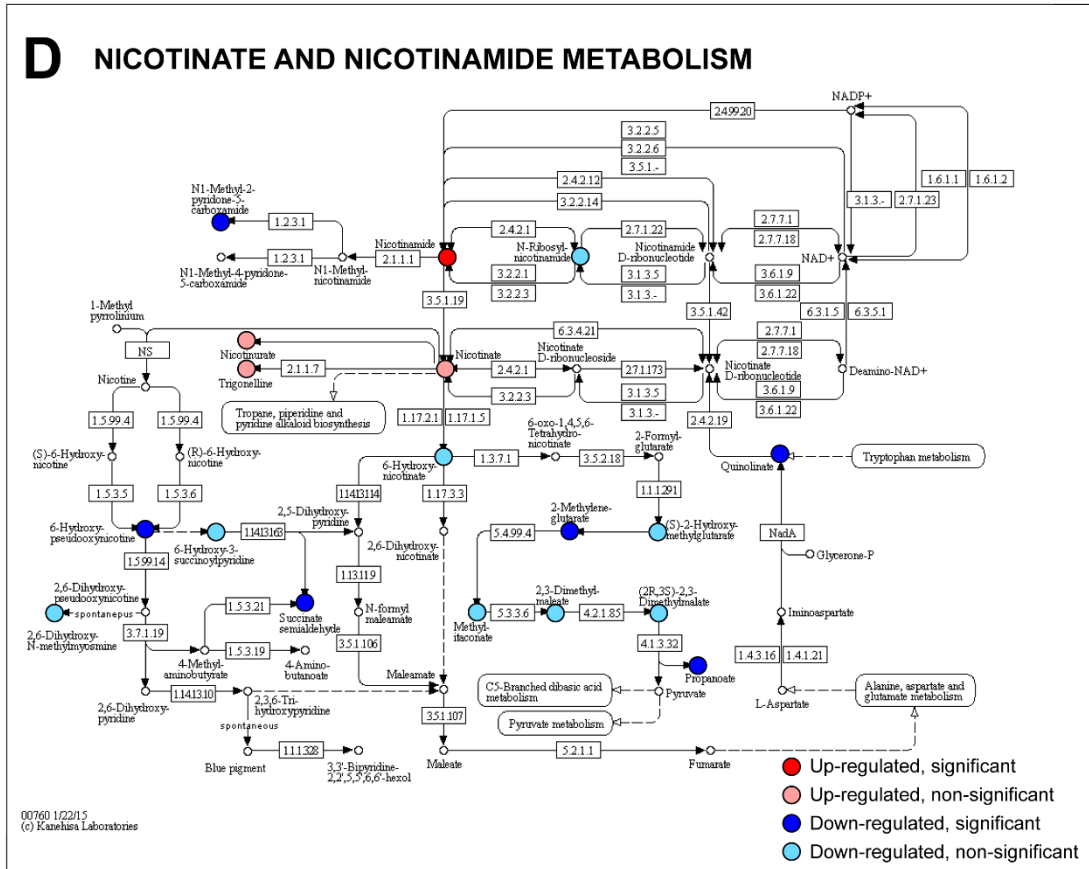

**Figure S3. The complete KEGG pathway maps of the potentially regulated metabolic pathways. A: the lysine degradation pathway; B: the arginine and proline metabolism pathway; C: the tyrosine metabolism pathway; D: the nicotinate and nicotinamide metabolism pathway. Identified metabolites with direction of changes are indicated with different colored circles.**

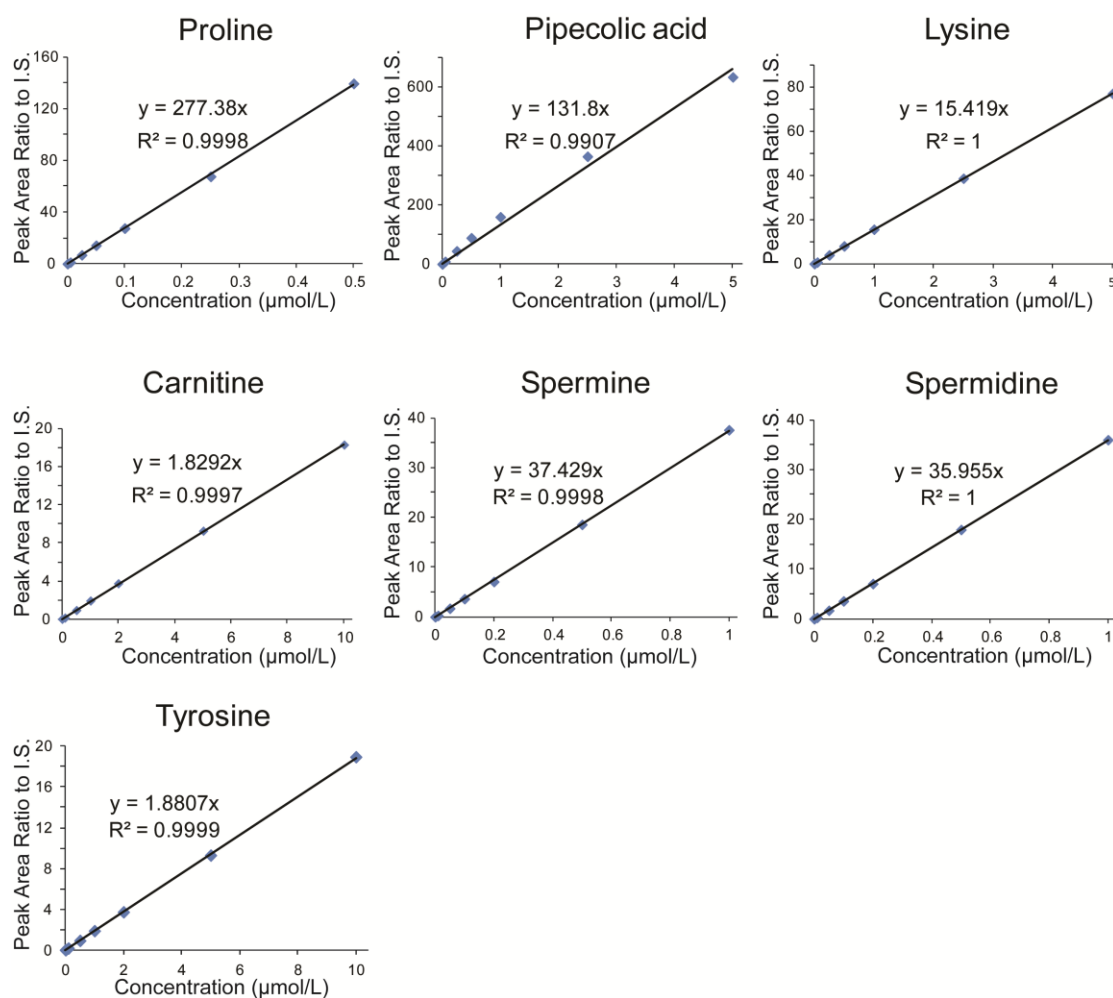

**Figure S4. Calibration curves for absolute quantification of selected metabolites.** Eight-point calibration curves were constructed with increasing amounts of each metabolite and a fixed concentration of the corresponding isotope-labeled internal standard (I.S.).



**American Urological Association Symptom Question 2. Frequency:**

Over the past month, how often have you had to urinate again less than 2 hours after you finished urination? (Not at all=0, Less than 1 time in 5=1, Less than half the time=2, About half the time=3, More than half the time=4, Almost always=5)

**American Urological Association Symptom Question 4. Urgency:**

Over the past month, how often have you found it difficult to postpone urination? (Not at all=0, Less than 1 time in 5=1, Less than half the time=2, About half the time=3, More than half the time=4, Almost always=5)

**Patient/Control Exclusion Criteria:**

● **Disease Exclusion:**

- Diabetes mellitu
- Neurologic disease
- Chronic prostatitis
- Chronic renal insufficiency
- Urinary tract infection within the past 2 months

● **Clinical Chemistry Exclusion:**

- Proteinuria >1+
- Hematuria >2 red blood cells per high power field on urinalysis
- Pyuria >5 white blood cells per high power field on urinalysis
- Serum Creatinine > 1.4

● **Medical History Exclusions:**

- Urinary tract instrumentation within the preceding 14 days
- Prior surgical or minimally invasive therapy for benign prostatic hyperplasia
- Active sacral nerve stimulation or equivalent

● **Drug Exclusions:**

- Anticholinergic
- Finasteride
- Dutasteride
- Complimentary alternative medicines for benign prostatic hyperplasia (eg. saw palmetto)

**Figure S5. Inclusion and exclusion parameters for patient recruitment.**  
AUA symptom index is a standard method to evaluate LUTS in men.

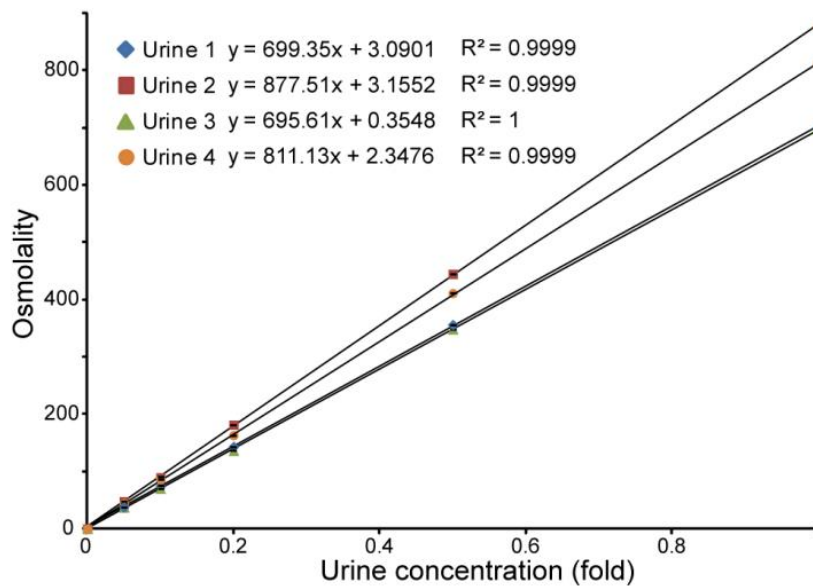

**Figure S6. Osmolality linearity of human urine metabolite fractions.** Four randomly selected urine samples were serially diluted to 2, 5, 10, and 20 folds, and their osmolality values were measured twice. The excellent osmolality linearity demonstrated the applicability of osmolality normalization for urine samples. Additionally, the osmolality of urinary metabolite fractions were not significantly different between disease ( $722 \pm 356$  Osmoles/kg  $H_2O$ ) and control groups ( $807 \pm 294$  Osmoles/kg  $H_2O$ ) ( $p$ -value = 0.37), suggesting that the total urinary metabolite output is not influenced by this disease.

**Table S1. Potentially regulated metabolic pathways.**

| Metabolic Pathway                      | KEGG ID  | # identified metabolites | <i>p</i> -value <sup>a</sup> |
|----------------------------------------|----------|--------------------------|------------------------------|
| Lysine degradation                     | Map00310 | 16                       | 0.02                         |
| Arginine and proline metabolism        | Map00330 | 31                       | 0.04                         |
| Nicotinate and nicotinamide metabolism | Map00706 | 18                       | 0.08                         |
| Tyrosine metabolism                    | Map00350 | 33                       | 0.08                         |

<sup>a</sup>The pathway's *p*-value was calculated as the median of *p*-values of all the identified metabolites involved.

**Table S2. Clinical information of recruited subjects.****(A) Subjects for metabolomics analysis**

|                       | LUTS       | Control    | <i>p</i> -value <sup>a</sup> |
|-----------------------|------------|------------|------------------------------|
| Sample size           | 26         | 20         | —                            |
| Sex                   | Male       | Male       | —                            |
| Age                   | 66 ± 11    | 59 ± 14    | 0.07                         |
| Body mass Index (BMI) | 29.6 ± 5.5 | 31.2 ± 6.8 | 0.21                         |

**(B) Subjects for collagen staining analysis**

|                              | LUTS           | Control       | <i>p</i> -value <sup>a</sup> |
|------------------------------|----------------|---------------|------------------------------|
| Sample size                  | 5              | 7             | —                            |
| Sex                          | Male           | Male          | —                            |
| Age                          | 63 ± 9         | 60 ± 5        | 0.46                         |
| Tangent modulus <sup>b</sup> | 1978 ± 314 kPa | 411 ± 274 kPa | 0.00002                      |

<sup>a</sup> Two-tailed *t*-test. Age and BMI are not significantly different between LUTS and Control groups

<sup>b</sup> Tangent modulus represents the passive stiffness of periurethral tissue of the patient in kPa. The periurethral tissues of LUTS patients have significantly higher tangent modulus values than the ones of control patients, corresponding to greater tissue stiffness in LUTS.

**Table S3. A list of 63 identified metabolites of interest.**

| Compound                                                 | m/z      | $\Delta$ ppm <sup>c</sup> | Time | Ratio <sup>d</sup> | p-value <sup>e</sup> | q-value <sup>f</sup> |
|----------------------------------------------------------|----------|---------------------------|------|--------------------|----------------------|----------------------|
| Tyrosine <sup>a</sup>                                    | 182.0813 | 0.6                       | 1.6  | -1.4               | 7.6E-5               | 9.7E-4               |
| Spermidine <sup>a</sup>                                  | 146.1652 | 0.0                       | 0.6  | 1.6                | 8.9E-3               | 1.6E-2               |
| spermine <sup>a</sup>                                    | 203.2232 | 0.8                       | 0.7  | 2.5                | 7.3E-3               | 1.4E-2               |
| Carnitine <sup>a</sup>                                   | 162.1125 | 0.0                       | 0.9  | -2.4               | 1.9E-5               | 4.5E-4               |
| Pipecolic acid <sup>a</sup>                              | 130.0865 | 1.7                       | 1.2  | 2.0                | 1.0E-2               | 1.6E-2               |
| N-Acetyl-glutamate <sup>a</sup>                          | 190.0710 | 0.1                       | 1.8  | -1.6               | 2.2E-8               | 2.8E-6               |
| Methyloxovaleric acid <sup>a</sup>                       | 131.0704 | 1.6                       | 10.7 | -17.5              | 1.3E-3               | 5.0E-3               |
| N6,N6-Dimethyl-lysine <sup>a</sup>                       | 175.1440 | 0.2                       | 0.8  | 1.3                | 2.3E-2               | 2.5E-2               |
| Citrulline <sup>a</sup>                                  | 176.1029 | 0.0                       | 0.9  | -1.7               | 1.2E-5               | 3.6E-4               |
| Vanillylamin <sup>b</sup>                                | 154.0863 | 0.3                       | 2.7  | 2.1                | 3.5E-3               | 8.8E-3               |
| Asp-Phe <sup>b</sup>                                     | 281.1132 | 0.1                       | 8.8  | 1.5                | 3.8E-3               | 9.3E-3               |
| Thiamine phosphate <sup>b</sup>                          | 346.0856 | 0.9                       | 13.6 | 11.2               | 7.8E-4               | 3.9E-3               |
| Indolepyruvic acid (+NH4) <sup>b</sup>                   | 221.0896 | 0.0                       | 8.2  | 2.5                | 3.6E-6               | 1.6E-4               |
| N-Methylmescaline <sup>b</sup>                           | 226.1437 | 0.0                       | 17.2 | -5.4               | 6.4E-4               | 3.4E-3               |
| 2-Octenedioic acid <sup>b</sup>                          | 173.0809 | 0.2                       | 12.7 | -1.6               | 3.4E-3               | 8.7E-3               |
| 6-Hydroxypseudooxynicotine <sup>b</sup>                  | 195.1129 | 0.5                       | 12.5 | -1.6               | 1.5E-5               | 4.1E-4               |
| S-Allylcysteine <sup>b</sup>                             | 162.0584 | 0.3                       | 9.0  | 3.2                | 5.0E-3               | 1.1E-2               |
| Ketoleucine <sup>b</sup>                                 | 131.0704 | 1.6                       | 6.5  | -7.8               | 3.3E-4               | 2.3E-3               |
| Hydroxy-pentahydroxyhexylamino-butyric acid <sup>b</sup> | 284.1343 | 1.1                       | 12.1 | -5.0               | 2.0E-2               | 2.4E-2               |
| Methylquinoline <sup>b</sup>                             | 144.0809 | 0.7                       | 10.0 | -1.9               | 1.1E-7               | 1.0E-5               |
| Dimethyltryptamine(+NH4)                                 | 206.1651 | 0.1                       | 11.4 | 5.0                | 2.4E-7               | 2.0E-5               |
| 4-(Ethylamino)-4-oxo-2-butenic acid                      | 144.0656 | 1.1                       | 4.1  | 1.9                | 1.5E-2               | 2.1E-2               |
| Dihydroxyadenine (+NH4)                                  | 185.0785 | 1.9                       | 4.8  | 3.1                | 9.3E-8               | 9.9E-6               |
| Arborinine                                               | 286.1082 | 2.8                       | 15.7 | 3.1                | 1.4E-2               | 2.0E-2               |
| 1-(Ethylcarbamoyl)isonipecotic acid (+Na)                | 223.1053 | 0.1                       | 6.0  | 4.2                | 8.4E-9               | 2.0E-6               |
| Oxohexanoic acid                                         | 131.0704 | 1.6                       | 5.1  | -8.1               | 2.3E-4               | 1.9E-3               |
| N6-Methyl-2-deoxyadenosine                               | 266.1236 | 4.5                       | 15.1 | 2.1                | 1.4E-2               | 2.0E-2               |
| Volkenin                                                 | 288.1078 | 0.1                       | 10.2 | -3.5               | 4.8E-4               | 3.0E-3               |
| Dopaxanthin quinone                                      | 389.0955 | 4.8                       | 11.3 | 10.3               | 1.9E-2               | 2.4E-2               |
| Dichloro-oxoadipate                                      | 226.9514 | 2.1                       | 0.7  | -2.3               | 6.3E-5               | 8.8E-4               |
| Deaza-adenosine                                          | 267.1075 | 4.5                       | 12.1 | -8.6               | 8.0E-3               | 1.5E-2               |
| Pyridosine                                               | 255.1339 | 0.2                       | 2.6  | 10.0               | 2.8E-3               | 8.0E-3               |
| Euchrenone b1                                            | 475.2476 | 0.6                       | 18.0 | 2.4                | 1.2E-8               | 2.0E-6               |
| Methylglutaric acid                                      | 147.0652 | 0.1                       | 0.8  | -1.7               | 2.9E-4               | 2.1E-3               |
| N-Heptanoylhomoserine lactone                            | 214.1438 | 0.1                       | 16.7 | 9.9                | 3.6E-4               | 2.4E-3               |
| 2-(4-Hydroxyphenyl)propionate                            | 166.0626 | 0.9                       | 14.3 | 1.5                | 4.2E-2               | 3.5E-2               |
| Diethyl-diethoxy-phenylene-biscarbamate                  | 341.1708 | 0.3                       | 14.1 | 1.3                | 4.3E-2               | 3.5E-2               |
| Diethyl oxalpropionate                                   | 203.0914 | 0.4                       | 15.1 | 1.9                | 2.7E-2               | 2.8E-2               |
| N-Benzoyloxycarbonyl-leucine                             | 266.1387 | 0.1                       | 12.9 | 1.4                | 5.8E-3               | 1.2E-2               |
| Retronecine                                              | 156.1019 | 0.5                       | 1.5  | -1.9               | 1.9E-3               | 6.4E-3               |
| Ilicifolinoside A                                        | 265.1284 | 0.8                       | 13.8 | -8.0               | 1.1E-2               | 1.7E-2               |
| 4-Methyldibenzothiophene                                 | 199.0578 | 0.9                       | 8.5  | 5.9                | 3.3E-3               | 8.7E-3               |
| (1-Methylpentyl)succinate                                | 201.1122 | 0.2                       | 13.6 | 1.7                | 3.0E-3               | 8.3E-3               |
| Indole carboxyl tetrahydro-thiazole                      | 249.0694 | 0.7                       | 17.1 | -12.0              | 5.0E-2               | 3.8E-2               |
| Citrylglutamate                                          | 322.0769 | 0.0                       | 1.7  | -1.4               | 2.5E-5               | 5.1E-4               |
| Iridodial                                                | 169.1224 | 0.4                       | 16.3 | -1.6               | 3.5E-3               | 8.8E-3               |

|                                                 |          |     |      |      |        |        |
|-------------------------------------------------|----------|-----|------|------|--------|--------|
| 2-Amino-diethoxy-phosphoryloxy-propionic acid   | 242.0788 | 0.1 | 18.0 | 2.8  | 4.5E-4 | 2.9E-3 |
| 4-Nitrophenylhydrazine                          | 154.0611 | 0.2 | 1.7  | -1.3 | 5.9E-3 | 1.2E-2 |
| Hydroxytyrosol                                  | 155.0703 | 0.0 | 12.7 | -1.6 | 1.5E-2 | 2.1E-2 |
| Pseudopelletierine                              | 154.1227 | 0.2 | 18.0 | 10.1 | 8.4E-5 | 1.0E-3 |
| 5-Hydroxyferulate                               | 211.0600 | 0.1 | 13.0 | -1.8 | 1.9E-2 | 2.3E-2 |
| Furcatin                                        | 429.1734 | 4.9 | 17.3 | 1.6  | 2.5E-3 | 7.5E-3 |
| Triphenyl-(2-phenylethyl)-pyrrole-2-carboxamide | 443.2128 | 2.4 | 17.1 | -7.1 | 1.1E-2 | 1.8E-2 |
| 2-Diphenylphosphanylbenzoate                    | 561.3124 | 1.1 | 18.1 | -6.7 | 2.6E-2 | 2.7E-2 |
| Oxyapramycin (+Na)                              | 578.2656 | 2.1 | 16.1 | -5.7 | 1.6E-2 | 2.1E-2 |
| Bis-hexylthio-thioisonicotinamide               | 371.1661 | 4.8 | 13.9 | -4.7 | 2.9E-2 | 2.9E-2 |
| Liensinine                                      | 575.2915 | 0.3 | 18.2 | -5.8 | 2.9E-2 | 2.9E-2 |
| N-Acetylpuromycin (+NH <sub>4</sub> )           | 531.2655 | 3.6 | 17.9 | -8.0 | 1.8E-2 | 2.3E-2 |
| L-Aminoadipate adenylate (+NH <sub>4</sub> )    | 509.1635 | 1.1 | 17.3 | 1.4  | 2.6E-3 | 7.7E-3 |
| Trityloxy-hexyl-oxyphthalonitrile               | 487.2387 | 1.4 | 17.6 | -7.4 | 1.5E-2 | 2.0E-2 |
| Acetamidobenzoyl-aminohydroxybutanoic acid      | 281.1133 | 0.4 | 7.5  | -1.6 | 9.2E-3 | 1.6E-2 |
| Dethiobiotin                                    | 215.1391 | 0.4 | 4.5  | 1.4  | 3.9E-4 | 2.6E-3 |
| 3-Hydroxycytosine glucuronide                   | 369.1294 | 0.4 | 13.9 | -1.7 | 6.5E-5 | 8.8E-4 |

<sup>a</sup> Confirmed with metabolite standard compounds.

<sup>b</sup> Confirmed with MS/MS fragmentation.

<sup>c</sup>  $\Delta$ ppm mass error =  $1 \times 10^6 \times |\text{detected } m/z - \text{theoretical } m/z| / \text{theoretical } m/z$ .

<sup>d</sup> Ratio > 0 : up-regulated metabolite; Ratio < 0 : down-regulated metabolite.

<sup>e</sup> *p*-value was calculated from Student's *t*-test.

<sup>f</sup> *q*-value was calculated from FDR method.
